# Supplementary figures and images for: Attention operates uniformly throughout the classical receptive field and the surround
Source: eLife journal article supplement (doi:10.7554/elife.17256), 2016-08-22

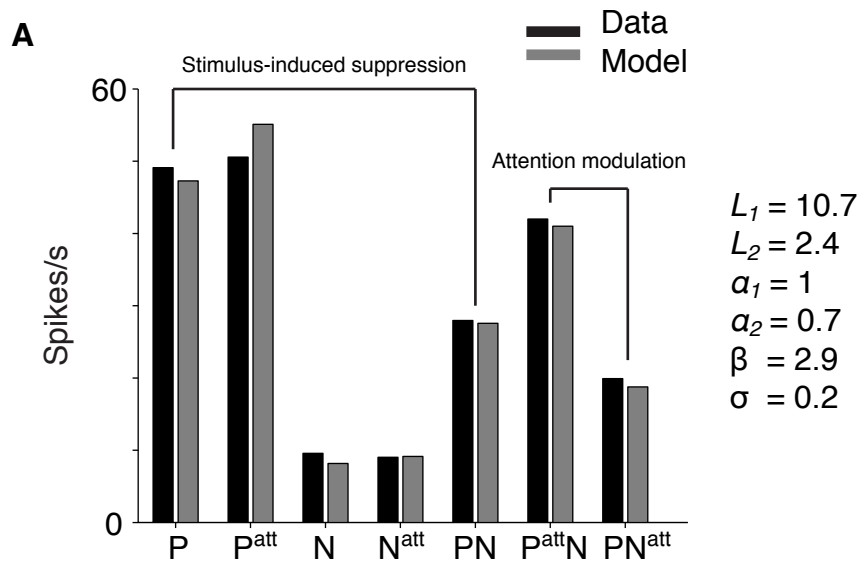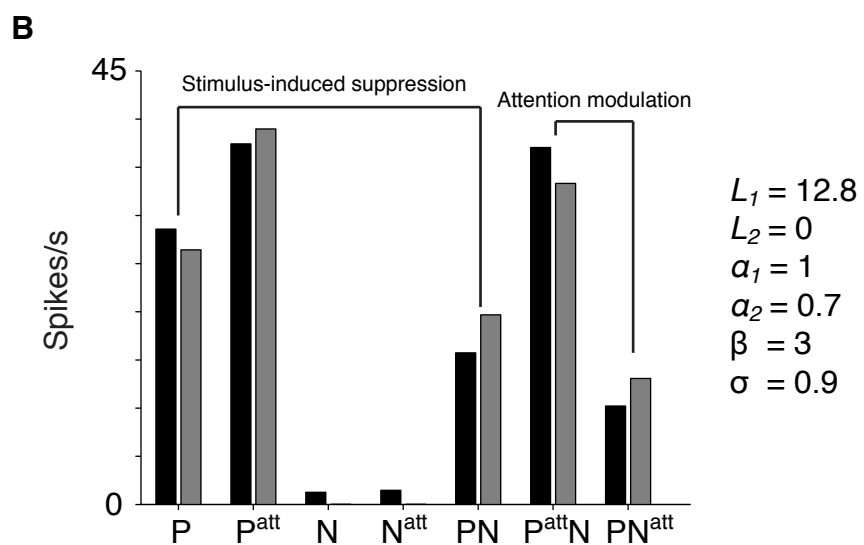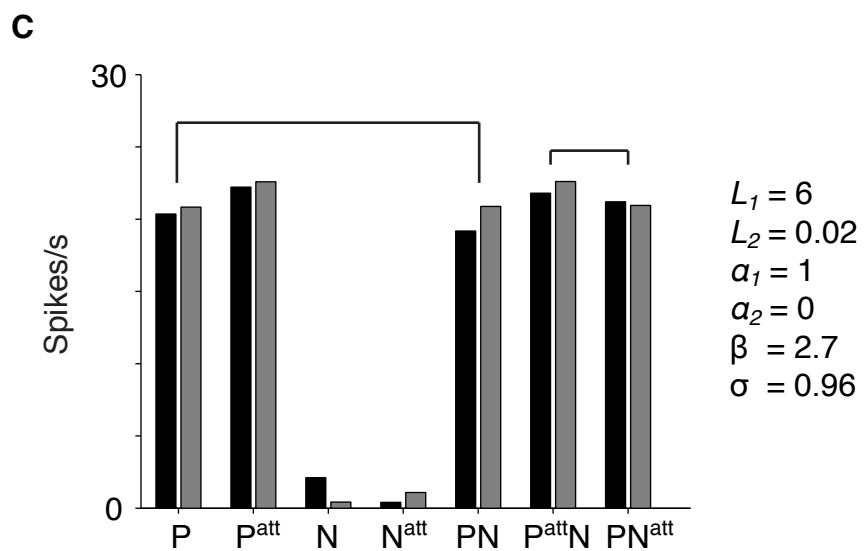

Supplement: supp [file elife-17256-supp-v1.zip]

**A**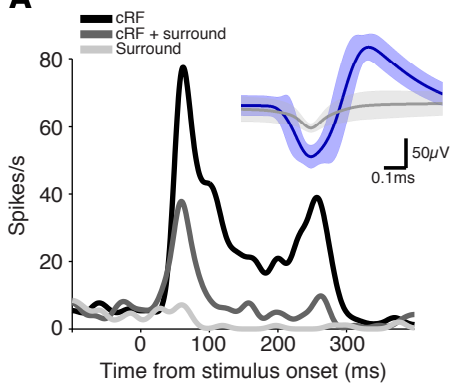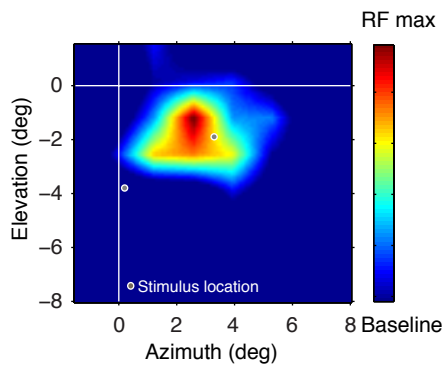**B**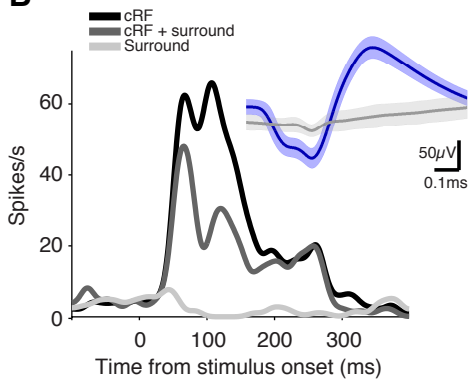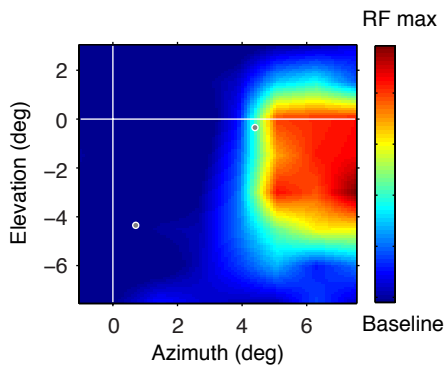**C**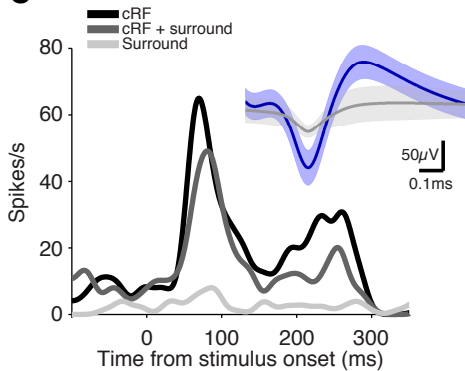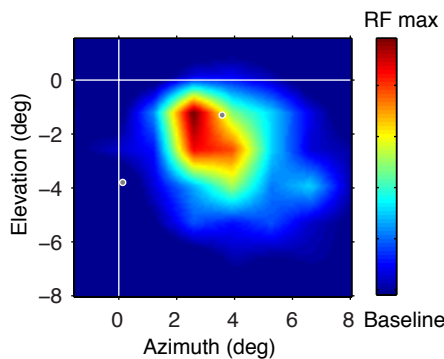

Supplement: supp [file elife-17256-supp-v1.zip]

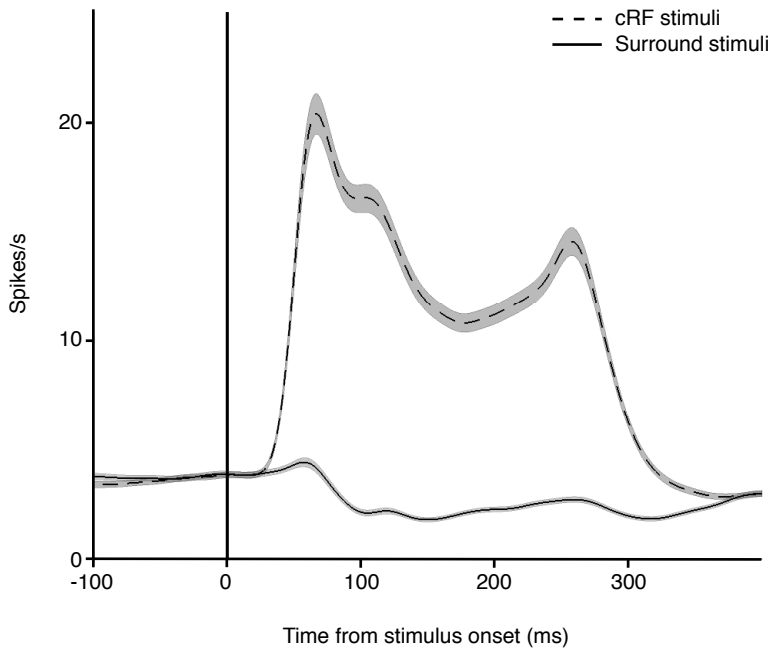

Supplement: supp [file elife-17256-supp-v1.zip]
